# Supplementary material for: CuNb1−xTaxO3(x ≤ 0.25) solid solutions: impact of Ta(v) substitution and Cu(i) deficiency on their structure, photocatalytic, and photoelectrochemical properties
Source: Royal Society of Chemistry journal article supplement (doi:10.1039/c5ta06609c), 2015-12-18
Supplement: c5ta06609c1.pdf [file c5ta06609c1.pdf]

## Supporting Information

“CuNb<sub>1-x</sub>Ta<sub>x</sub>O<sub>3</sub> (x ≤ 0.25) Solid Solution: Impact of Ta(V) Substitution and Cu(I) Deficiency on its Structure, Photocatalytic, and Photoelectrochemical Properties”

Brandon Zoellner,<sup>a</sup> Sean Stuart,<sup>b</sup> Ching-Chang Chung,<sup>c</sup> Daniel B. Dougherty,<sup>b</sup> Jacob Jones,<sup>c</sup> and Paul A. Maggard<sup>\*,a</sup>

<sup>a</sup>*Department of Chemistry,* <sup>b</sup>*Department of Physics,* and <sup>c</sup>*Department of Materials Science and Engineering, North Carolina State University, Raleigh, NC 27695-8204, United States*

**Table S1.** An example listing of the Miller (*hkl*) indices used for lattice parameter refinements of CuNb<sub>1-x</sub>Ta<sub>x</sub>O<sub>3</sub> in LATCON.

| Miller Indices ( <i>hkl</i> ) | Calculated 2θ (°) |
|-------------------------------|-------------------|
| 001                           | 13.075            |
| 110                           | 14.030            |
| 11-1                          | 19.134            |
| 111                           | 19.311            |
| 021                           | 24.846            |
| 220                           | 28.276            |
| -112                          | 29.832            |
| 310                           | 30.153            |
| -221                          | 31.142            |
| 20-2                          | 32.258            |
| 202                           | 32.693            |
| 130                           | 33.186            |
| 022                           | 33.935            |
| 400                           | 37.884            |
| 312                           | 40.708            |
| 040                           | 42.823            |
| 330                           | 42.985            |
| -331                          | 44.998            |
| 240                           | 47.096            |
| -332                          | 50.885            |
| -422                          | 51.465            |
| 422                           | 52.059            |
| 004                           | 54.182            |
| -224                          | 61.968            |
| 60-2                          | 64.644            |
| -134                          | 64.903            |
| 532                           | 65.753            |

**Table S2.** Refined atomic positions, fractional occupancies, and  $U_{\text{iso}}$  values for the atomic positions in  $\text{Cu}_{1-x}\text{NbO}_3$ .

| Atom | x           | y           | z          | Site Occupancy | $U_{\text{iso}}$ |
|------|-------------|-------------|------------|----------------|------------------|
| Cu 1 | 0.00000     | 0.1702(3)   | 0.50000    | 0.983          | 0.0212(15)       |
| Cu 2 | 0.7671(4)   | 0.00000     | 0.2869(6)  | 0.948          | 0.0217(16)       |
| Nb 1 | 0.00000     | 0.20067(25) | 0.00000    | 1.000          | 0.0040(8)        |
| Nb 2 | 0.25060(28) | 0.00000     | 0.2340(4)  | 1.00           | 0.0185(11)       |
| O 1  | 0.3640(12)  | 0.1550(11)  | 0.1037(17) | 1.00           | 0.016(3)         |
| O 2  | 0.0764(10)  | 0.8265(10)  | 0.2557(16) | 1.00           | 0.012(4)         |
| O 3  | 0.1237(13)  | 0.00000     | 0.9601(22) | 1.00           | 0.010(6)         |
| O 4  | 0.3404(14)  | 0.00000     | 0.4939(22) | 1.00           | 0.005(5)         |

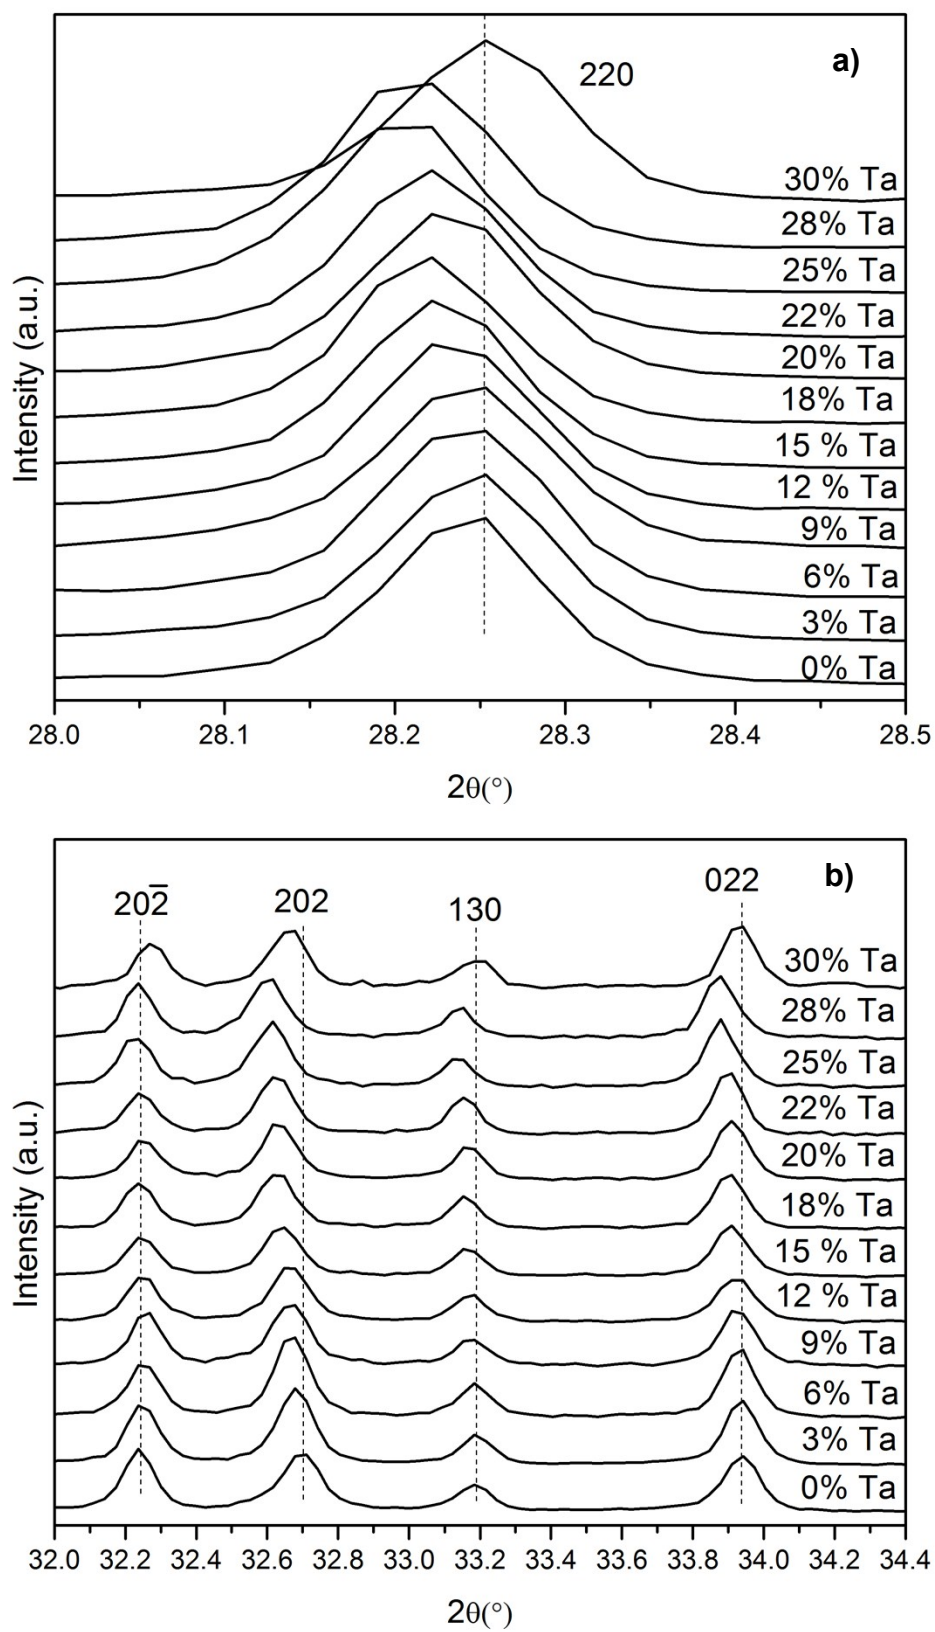

**Figure S1.** Powder X-ray diffraction of  $\text{CuNb}_{1-x}\text{Ta}_x\text{O}_3$  with the 220 peak (a) and the 202, 130, and 022 peaks (b) shifting to lower  $2\theta$  with the increasing Ta(V) percentage.

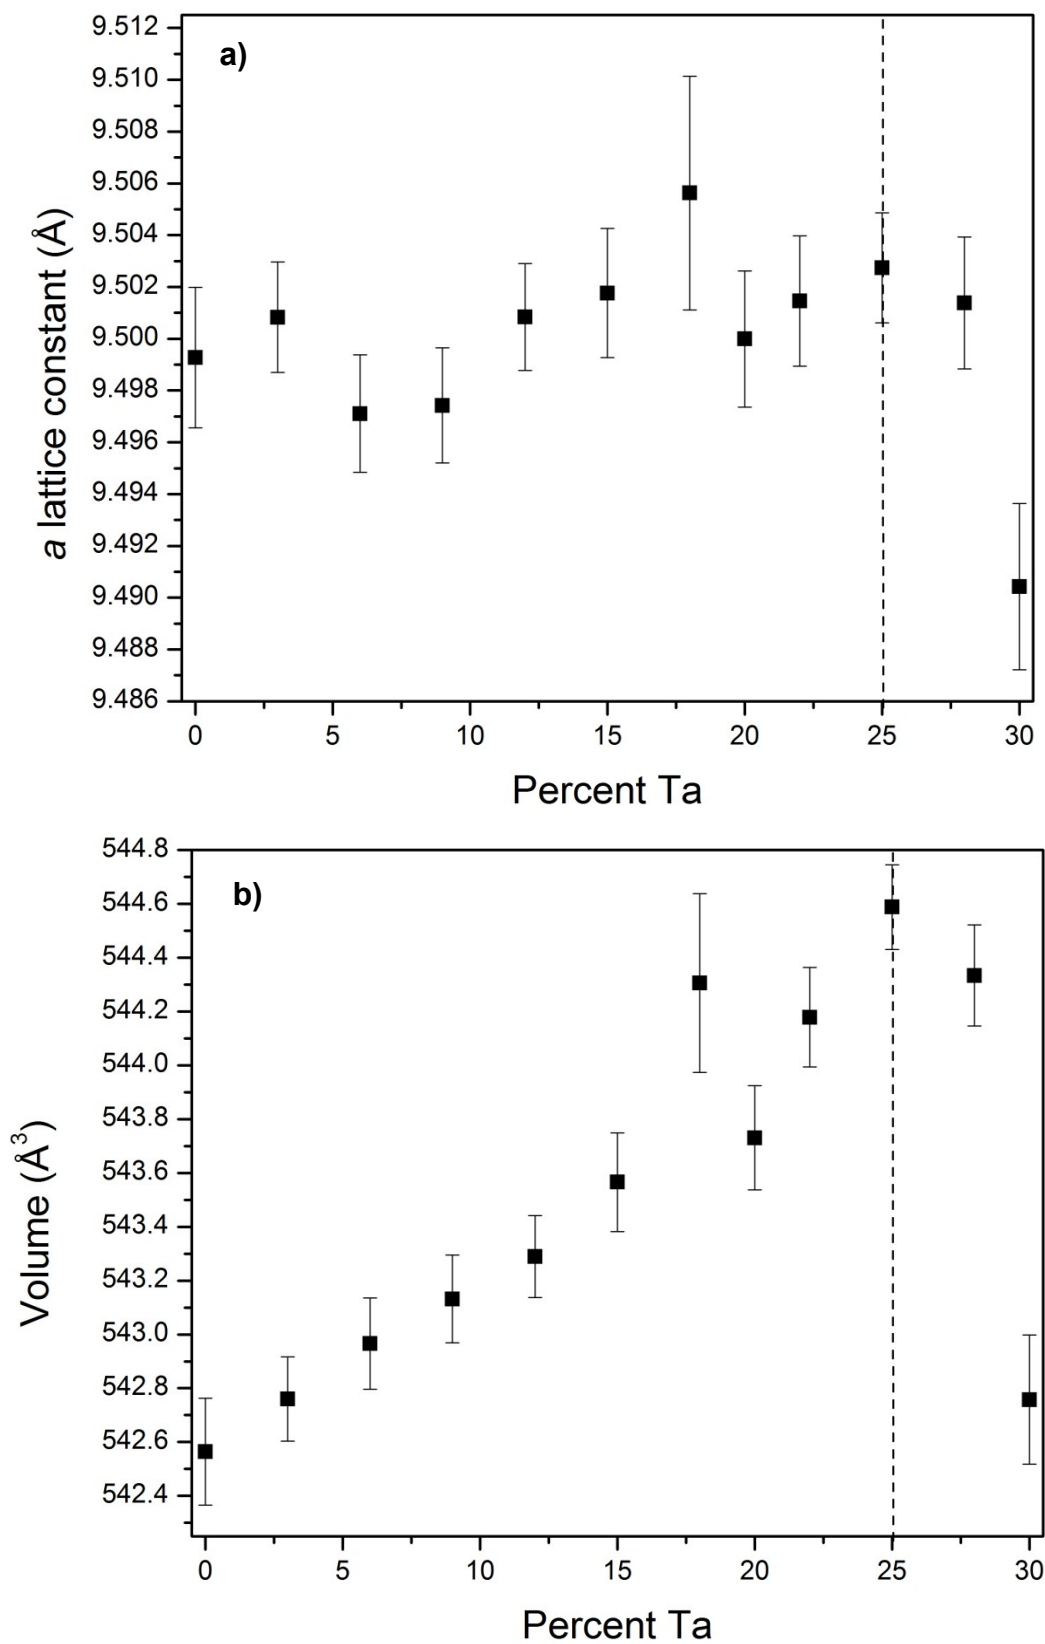

**Figure S2.** Refined lattice parameter  $a$  (a) and unit cell volume (b) of  $\text{CuNb}_{1-x}\text{Ta}_x\text{O}_3$  ( $0 \leq x \leq 0.25$ ).

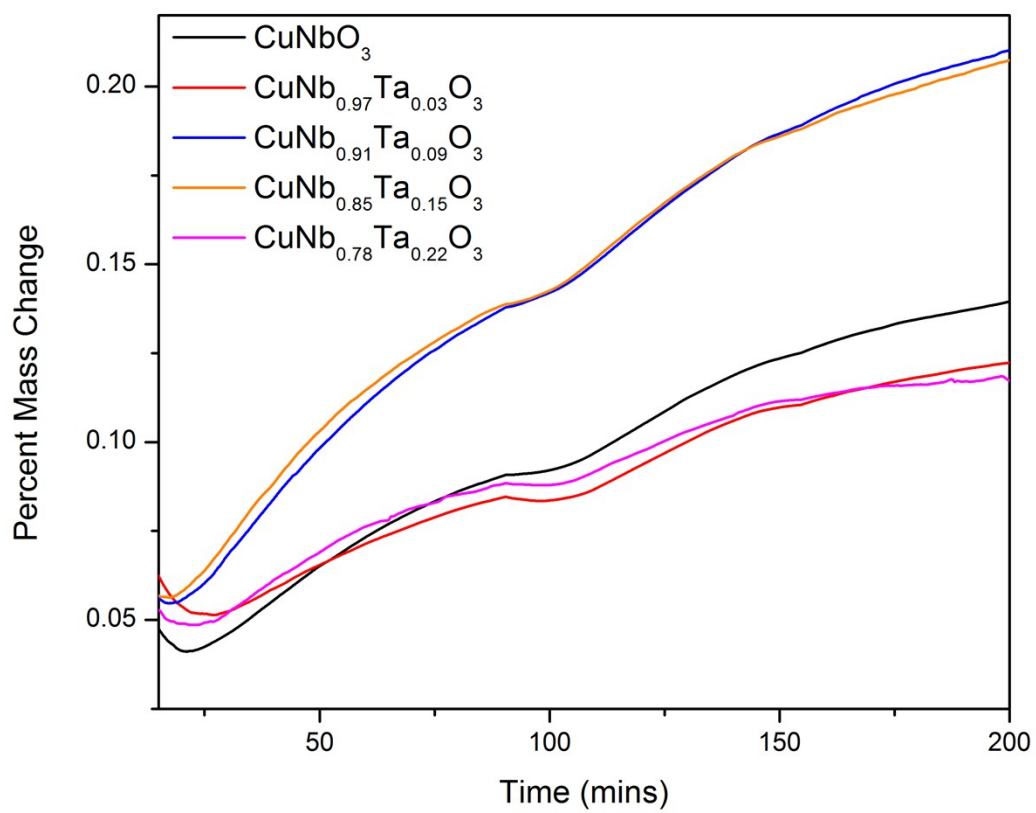

**Figure S3.** Weight gain versus time when heating  $\text{CuNb}_{1-x}\text{Ta}_x\text{O}_3$  ( $x = 0, 0.03, 0.09, 0.15, 0.22$ ) at 250 °C for 3 hrs in air.

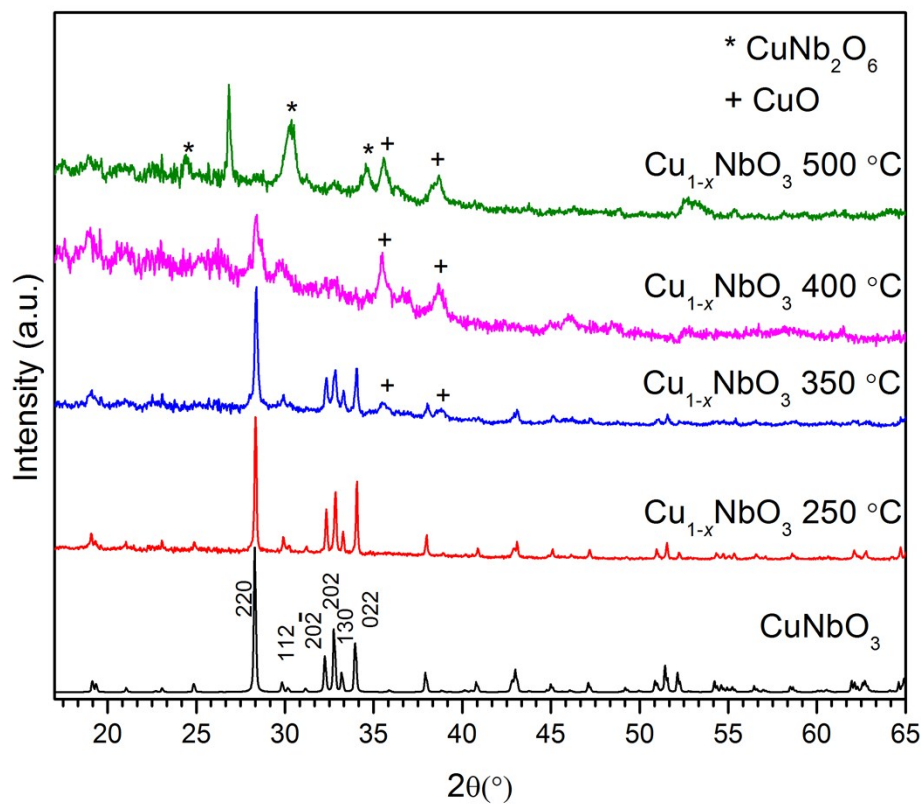

**Figure S4.** Powder X-ray diffraction of  $\text{Cu}_{1-x}\text{NbO}_3$  films heated at 250, 350, 400, and 500 °C for 3 hours. New peaks corresponding to  $\text{CuO}$  and  $\text{CuNb}_2\text{O}_6$  were identified at temperatures of 350 °C and higher.

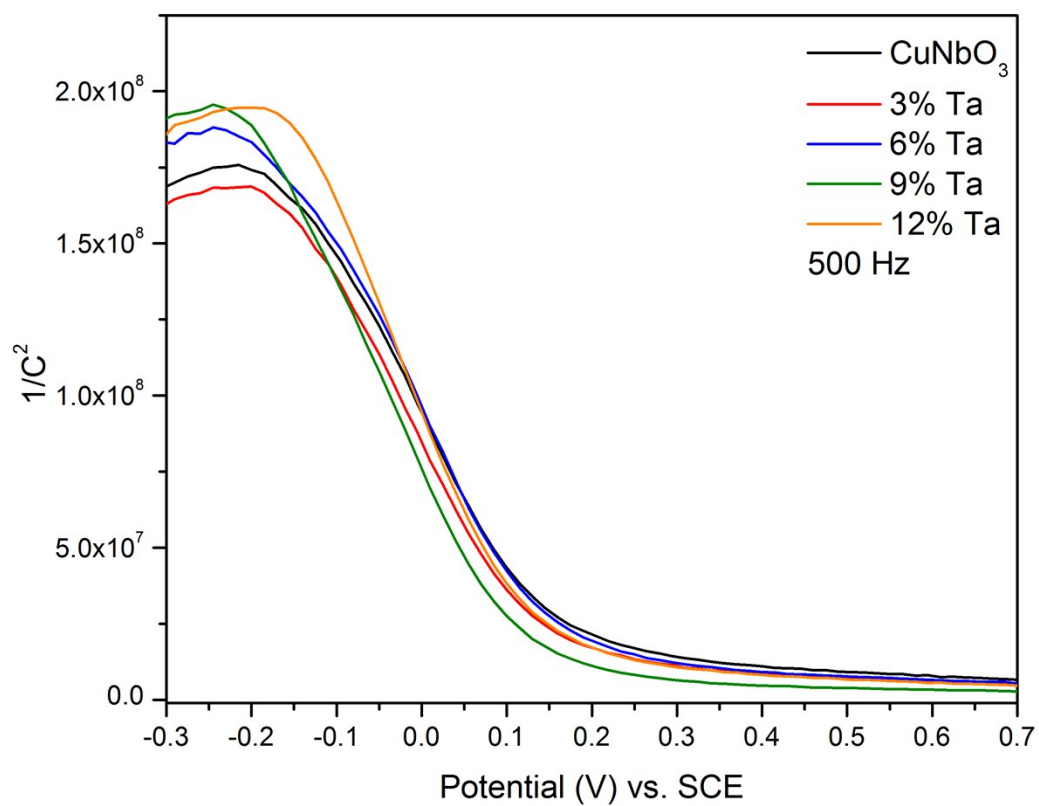

**Figure S5.** Mott-Schottky measurements of  $\text{CuNb}_{1-x}\text{Ta}_x\text{O}_3$  ( $x = 0, 0.03, 0.06, 0.09$ , and  $0.12$ ) with a fixed AC frequency of 500 Hz.

## Mott-Schottky Analysis and Equations

### *Acceptor Density ( $N_A$ )*

The charge acceptor density ( $N_A$ ) within the metal oxide is calculated from the equation below.

$$N_A = \frac{2}{e \epsilon_r \epsilon_0 A^2 m}$$

The slope of the linear portion of each plot ( $m$ ) is determined and used in the equation. The value of the dielectric for all the samples is approximated to 35 F/m and the area of the films studied was  $\sim 4 \text{ cm}^2$ .

### *Energy of the valence band ( $E_v$ )*

The final calculation for the energy position of the valence band is done with the equation shown below.

$$E_v = E_{fb} + kT \ln(N_A/N_v)$$

In the equation, the effective density of states for the valence band ( $N_v$ ) is approximated to  $10^{19} \text{ cm}^{-3}$ .
